# Supplementary material
Source: PubMed Central journal article supplement (PMC5462026)
Supplement: supp_pp.17.00098_PP2017-00098R1_Supplemental_Materialfigstbls.pdf [file supp_pp.17.00098_PP2017-00098R1_Supplemental_Materialfigstbls.pdf]

1 **Supplemental Figures**

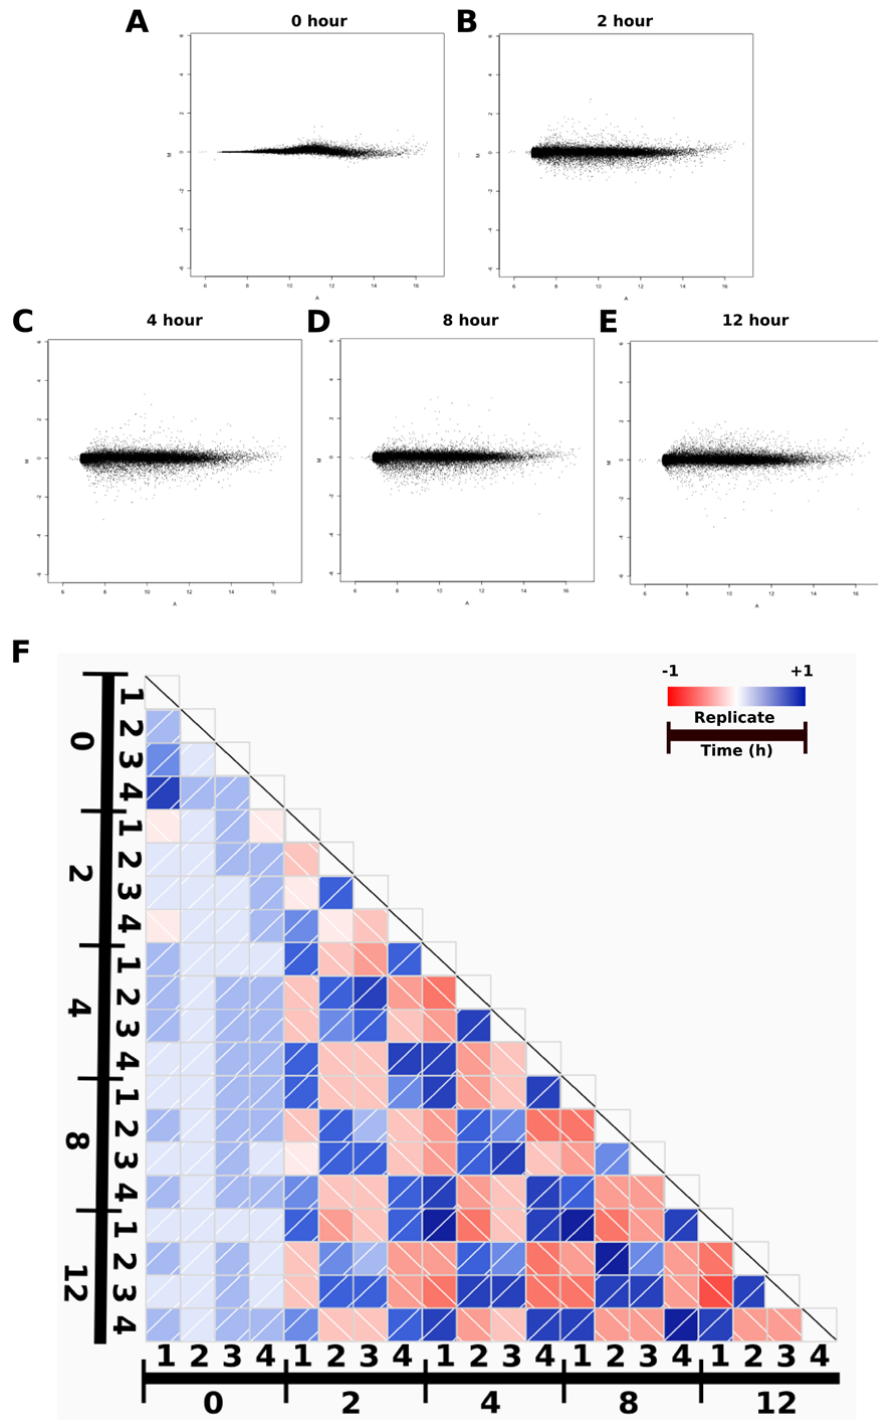

2

3 **Supplemental Figure S1: Microarray analysis of LFY-GR time-course experiment.**

4 (A-E) MA plots for each time-point (as indicated) of the p35S:LFY-GR *ap1 cal* time-course

5 experiment. (F) Correlelogram indicating correlation between M-values from the different

6 replicate experiments for each time-point. Due to dye-swaps being conducted for replicate  
7 experiments, both positive and negative correlation values were obtained. Slashed boxes at  
8 the end of each row indicate self/self comparisons.

9

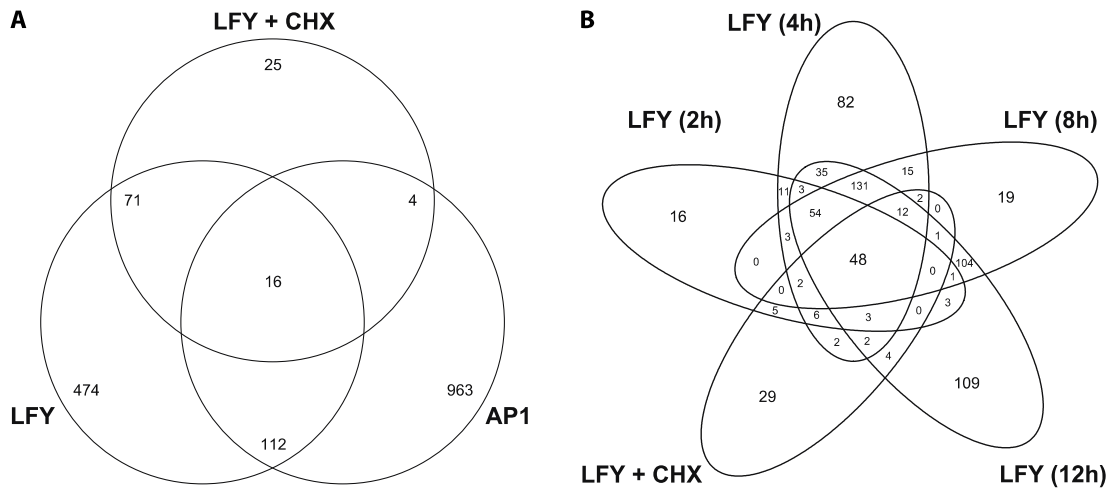

10

11 **Supplemental Figure S2: Activation of LFY-GR in the presence of cycloheximide.**

12 (A) Overlap between DEGs identified in the p35S:LFY-GR *ap1 cal* (LFY) and p35S:AP1-  
 13 GR *ap1 cal* (AP1) time-course experiments, and the p35S:LFY-GR *ap1 cal* experiment where  
 14 LFY-GR was activated in the presence of cycloheximide (LFY+CHX). (B) Overlap between  
 15 DEGs identified in each time-point (as indicated) of the p35S:LFY-GR *ap1 cal* (LFY) time-  
 16 course experiment, and the p35S:LFY-GR *ap1 cal* experiment where LFY-GR was activated  
 17 in the presence of cycloheximide (LFY+CHX).

18

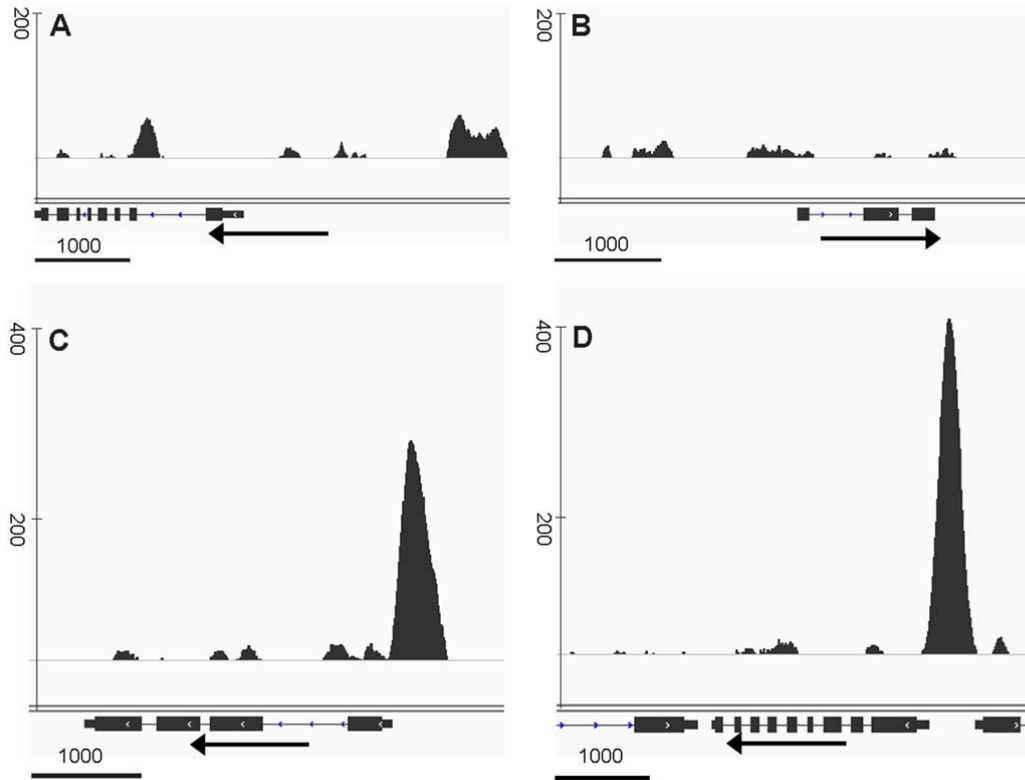

19

20 **Supplemental Figure S3: ChIP-seq results for known LFY target genes.**

21 Using a LFY-specific antiserum, ChIP-seq experiments were conducted with p35S:LFY-GR  
 22 *ap1 cal* plants 4 h after treatment with a dexamethasone-containing solution. Results for (A)  
 23 *SEP3*, (B) *LMI1*, (C) *ELA1*, and (D) *LMI5* are shown. Scale bars indicate sequence lengths (in  
 24 base pairs), and arrows indicate gene orientations.

25

26

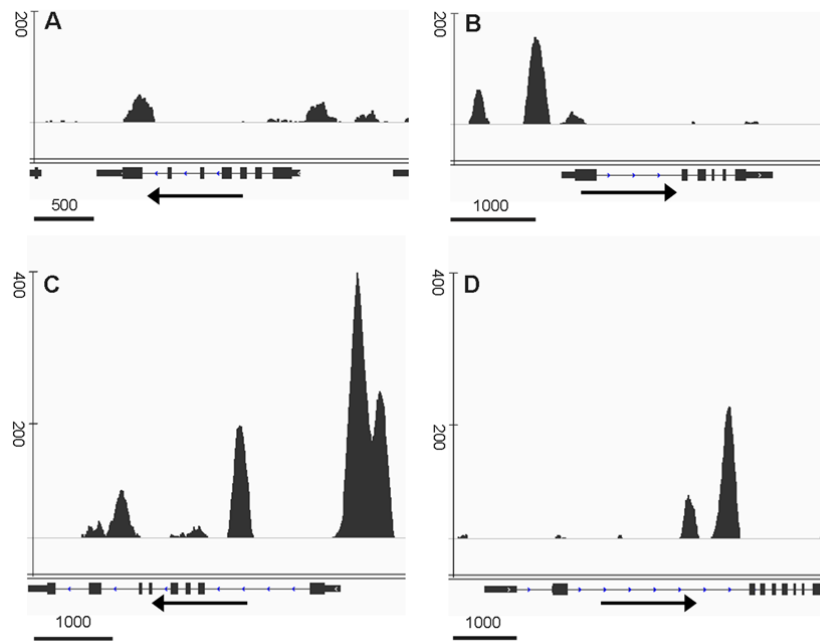

27

28 **Supplemental Figure S4: ChIP-seq results for floral organ identity genes.**

29 Using a LFY-specific antiserum, ChIP-seq experiments were conducted with p35S:LFY-GR  
30 *ap1 cal* plants 4 h after treatment with a dexamethasone-containing solution. Results for (A)  
31 *AP3*, (B) *PI*, (C) *API*, and (D) *AG* are shown. Scale bars indicate sequence lengths (in base  
32 pairs), and arrows indicate gene orientations.

33

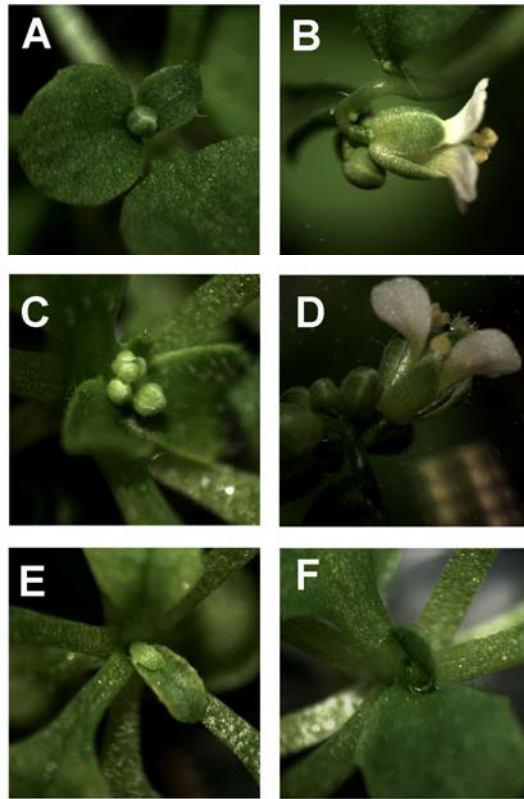

34

35 **Supplemental Figure S5: Flowering after LFY-GR activation in wild-type and *ap1 cal***  
36 **double-mutant plants.**

37 Seeds of different genotypes were germinated on plates with a medium containing 50 nM  
38 dexamethasone. (A, B) Wild type. (C, D) p35S:LFY-GR. (E, F) p35S:LFY-GR *ap1 cal*.

39 Representative images of approximately 5 week-old plants selected from three independent  
40 experiments are shown. Note the absence of inflorescences in panels E and F.

41

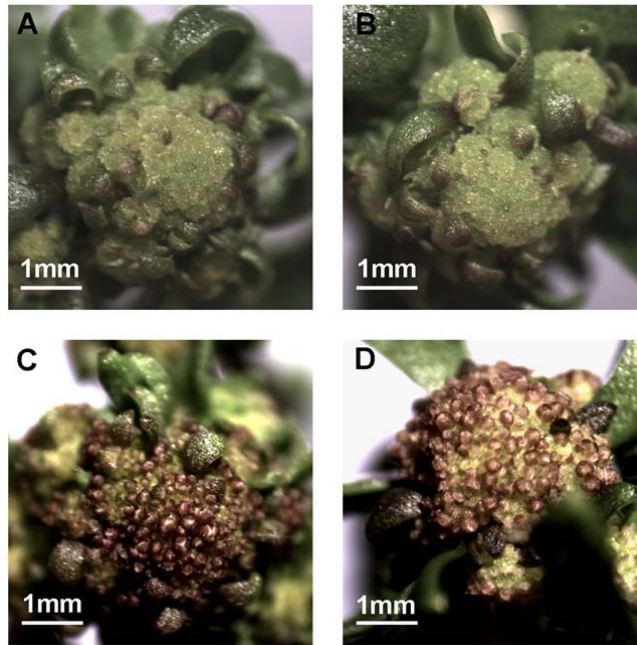

42

43 **Supplemental Figure S6: Activation of AP1 rescues the late flowering phenotype of *ap1***  
44 ***cal* plants observed after LFY-GR activation.**

45 *Ap1 cal* plants carrying the p35S:LFY-GR transgene as well as a construct that mediates  
46 expression of a fusion between AP1 and the hormone binding domain of the androgen  
47 receptor (AR) from the AP1 promoter (pAP1:AP1-AR; O'Maoileidigh et al., 2015) were  
48 treated with the following solutions: **(A)** A mock solution (containing no steroid hormones).  
49 **(B)** A solution containing 10  $\mu$ M dexamethasone (to activate LFY-GR). **(C)** A solution  
50 containing 500  $\mu$ M dihydrotestosterone (to activate AP1-AR). **(D)** A solution containing 10  
51  $\mu$ M dexamethasone and 500  $\mu$ M dihydrotestosterone (to activate both LFY-GR and AP1-  
52 AR). Images were taken 6 d after the treatments. Note the formation of (brownish; most likely  
53 caused by anthocyanin accumulation) floral buds in panels C and D.

54

55 **Supplemental Tables**

56 **Supplemental Table S1: Differentially expressed genes identified in the p35S:LFY-GR**  
57 ***ap1 cal* time-course experiment.**

58 For each time-point, the number of differentially expressed genes (No. DEGs), and the  
59 numbers of genes that were up- or down-regulated relative to mock-treated control plants are  
60 shown.

| <b>Time-point [h]</b> | <b>0</b> | <b>2</b> | <b>4</b> | <b>8</b> | <b>12</b> |
|-----------------------|----------|----------|----------|----------|-----------|
| No. DEGs              | 0        | 202      | 465      | 456      | 537       |
| Up-regulated          | 0        | 63       | 114      | 120      | 134       |
| Down-regulated        | 0        | 139      | 351      | 336      | 403       |

61

62

63 **Supplemental Table S2: Primers used for PCR genotyping and the generation of**  
64 **constructs.**

65 Primer names and sequences are shown.

| <b>Primer Name</b> | <b>Sequence (5'-&gt;3')</b>  |
|--------------------|------------------------------|
| DM400              | TCCGACAAGATCCTTTGAGCAC       |
| DM494              | AGTACATTAAAAACGTCCGCAATGTG   |
| KG2                | CCTCGTCTCTCTATTTGGTATGTTC    |
| KG14               | TAATTCAGAGGAGACAAACAGCAT     |
| LR177              | CGTCATATGGGAGGTAGTGGTTTGGGG  |
| LR178              | CGGGATCCCTAGAAACGCAAGTCGTCGC |

66

67



68 **Supplemental Table S3: Primers used for qRT-PCR analysis.**

69 Gene identifiers ('AGI'), gene aliases and primer sequences are shown.

| AGI       | Alias | Forward Primer (5'→3')           | Reverse Primer (5'→3')            |
|-----------|-------|----------------------------------|-----------------------------------|
| At4g36920 | AP2   | GGAATCCTACTACTCCAC<br>AAGATCACAA | GGTTCATCCTGAGCCGCATA              |
| At4g35900 | FD    | GCCAAGATTCCAATGAA<br>GGTTCAGG    | AAGTGAGCAACTTCAAGTTCT<br>AACTCGTT |
| At5g03790 | LMI1  | CACGTCAGATAGCAGTTT<br>GGTCC      | CCCTGGTCTCTTAGTAAAGCT<br>CTC      |
| At5g03840 | TFL1  | TCCTTCTTCTGTTTCCTCC<br>AAG       | ACATCTGGGTCTATCATCACC<br>A        |
| At1g13320 | REF1  | AAGCGGTTGTGGAGAAC<br>ATGATACG    | TGGAGAGCTTGATTTGCGAAA<br>TACCG    |

70

71 **Supplemental Table S4: Primers used for ChIP-qPCR analysis.**

72 Gene identifiers ('AGI'), gene aliases and primer sequences are shown.

| AGI       | Alias         | Forward Primer (5'→3')          | Reverse Primer (5'→3')                                                                |
|-----------|---------------|---------------------------------|---------------------------------------------------------------------------------------|
| At1g69120 | API1          | GGAAATCTCCGCCGTCAA<br>T         | TGGTCCTTCCCAAGTGTCAT                                                                  |
| At5g03840 | TFL1          | CGAAGCCGCAAACCTGGT<br>G         | AGAGTCGTTCTAAACCGAAG<br>TATGG                                                         |
| At1g16070 | LMI5/TLP<br>8 | GTGTCTTTGGTTCTGTGCT<br>CG       | CAGGTGTTTGACAATGGTAC<br>TGAG                                                          |
| At4g21870 | -             | CCACATGAACCATTTGAG<br>CAAGTTGC  | CGTGAGTGAGTCGACACAAT<br>TCGTGAGTGAGTCGACACAA<br>TTGTTGGCGTGAGTGAGTCG<br>ACACAATTGTTGG |
| At3g05220 | -             | GGTCAAGGTGGTCCGATG<br>GGTATG    | GCAAGCCTTGAACCGCTGG                                                                   |
| At5g09810 | ACTIN         | CGTTTCGCTTTCCTTAGTG<br>TTAGCT   | AGCGAACGGATCTAGAGAC<br>TCACCTTG                                                       |
| At4g03870 | TUBULIN       | ATCCGTGAAGAGTACCCA<br>GAT       | AAGAACCATGCACTCATCAG<br>C                                                             |
| At4g03870 | Mu            | GATTTACAAGGAATCTGT<br>TGGTGGT   | CATAACATAGGTTTAGAGCA<br>TCTG C                                                        |
| At4g39400 | BRI1          | ACCCAGCACTAAACAGAA<br>GATCAG    | CCCAACCACCTATCTCTTGA<br>TTCTC                                                         |
| At4g26930 | REF1          | TCTCCGACCTTTCTTCACA<br>CCCATTCC | GTCTCCGCTTAGGAGCACGA<br>AAGCTATC                                                      |

73 **Supplemental Datasets**

74 **Supplemental Dataset 1: DEGs identified in LFY-GR *ap1 cal* time-course experiment.**

75 For each DEG, the identifier (Locus), description and alias is provided. Log<sub>2</sub>-transformed  
76 fold-change values, *P*-values and adjusted *P*-values are listed for each time-point. The column  
77 ‘In AP1 dataset?’ indicates whether or not a given DEG was also found among genes  
78 identified as differentially expressed after activation of AP1-GR in *ap1 cal* inflorescences  
79 (Kaufmann et al., 2010). The column ‘Antagonistic?’ indicates genes with opposite  
80 expression changes after LFY-GR and AP1-GR activation, respectively.

81

82 **Supplemental Dataset 2: DEGs identified after activating LFY-GR in *ap1 cal***  
83 **inflorescences in the presence of cycloheximide.**

84 List of 116 DEGs identified after activation of LFY-GR in the presence of cycloheximide. For  
85 each DEG, the identifier (Locus), description and alias is provided. Log<sub>2</sub>-transformed fold-  
86 change values, *P*-values and adjusted *P*-values are also listed. The column ‘Also in LFY-GR  
87 time-course?’ indicates whether or not a given DEG was also found among genes identified as  
88 differentially expressed in the p35S:LFY-GR in *ap1 cal* time-course experiment.

89

90 **Supplemental Dataset 3: DEGs with LFY binding sites and results of ChIP-seq**  
91 **experiments.**

92 The sheet ‘DEGs bound’ lists the DEGs and data provided in Supplemental Dataset 1. The  
93 columns on the right indicate whether a LFY binding peak was found be associated with a  
94 given DEG in the genome-wide localization studies by Winter et al. (2011), Moyroud et al.  
95 (2011), and the present study.

96 The sheet 'LFY ChIP-seq' lists the results of the LFY ChIP-seq experiment conducted for this  
97 study. A standard output file for *MACS* version 1.4 is provided (see Material and Methods for  
98 details).

99

100

101

102

103

104

105

106
